# Supplementary material for: IL-6 Induced by Periodontal Inflammation Causes Neuroinflammation and Disrupts the Blood–Brain Barrier
Source: MDPI journal article supplement (doi:10.3390/brainsci10100679), 2020-09-27
Supplement: s1 [file s1]

Table S1. Sense primers and antisense primers for RT-PCR

|              |         |                            |
|--------------|---------|----------------------------|
| <i>Gapdh</i> | Forward | TGGCCTTCCGTGTTCTACC        |
|              | Reverse | GTGTAGCCCAAGATGCCCTTC      |
| <i>Il6</i>   | Forward | GAAATGAGAAAAGAGTTGTGCAATGG |
|              | Reverse | ATATCCAGTTTGGTAGCATCCATCAT |
| <i>Il1b</i>  | Forward | CCTTGTGCAAGTGTCTGAAGC      |
|              | Reverse | TCATCTTTTGGGGTCCGTCAAC     |
| <i>Tnfa</i>  | Forward | CTATGTCTCAGCCTCTTCTC       |
|              | Reverse | CATTTGGGAACTTCTCATCC       |
| <i>Cldn5</i> | Forward | AAGGTGTATGAATCTGTGCTGGC    |
|              | Reverse | GTGCTACCCGTGCCTTAACTG      |
| <i>Ocln</i>  | Forward | CTCGGTACAGCAGCAATGGTAA     |
|              | Reverse | TTGTTGATCTGAAGTGATAGGTGGA  |
| <i>Zol</i>   | Forward | CTAAGCCAGTCCATTCTCAGAGC    |
|              | Reverse | CCACAGCATCAGTTTCGGGTT      |

## **Materials and methods**

### **1, IgG immunostaining**

BBB permeability for bigger molecule was assessed by IgG immunostaining. Brain slices were fixed with methanol for 10 min and were permeabilized with 0.5% Triton-X 100 for 45 minutes. Antigens were activated by Liberate Antibody Binding Solution (Polysciences, Inc., PA Warrington, USA). Endogenous peroxidases were inactivated with 0.3% H<sub>2</sub>O<sub>2</sub> in methanol. Brain sections were blocked with diluted normal donkey serum (Jackson ImmunoResearch, West Grove, PA, USA) at 4°C overnight, after rinsing with PBS, were incubated with antibodies, donkey anti-mouse-IgG (1:250 R&D systems) at room temperature for 1h. As chromogenic substrate 3,3'-diaminobenzidine tetrahydrochloride (Dako, Redox, Romania, code K3468) was used and counterstained with hematoxylin.

Non ligature

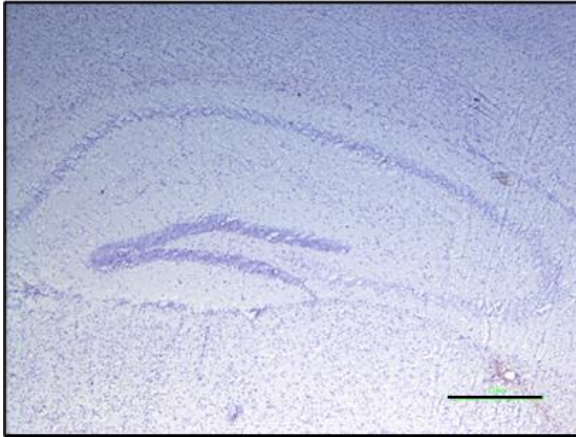

Ligature

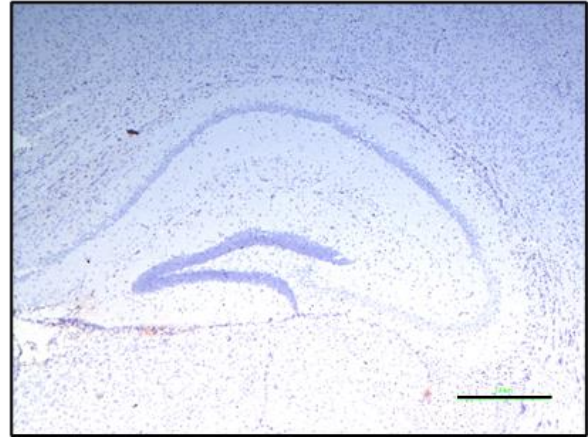

Supplemental figure 1.

Leakage of IgG in hippocampus. IgG were not detected in hippocampus both in non-ligature and ligature mice. Bar=500  $\mu$ m.

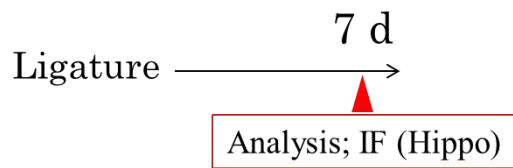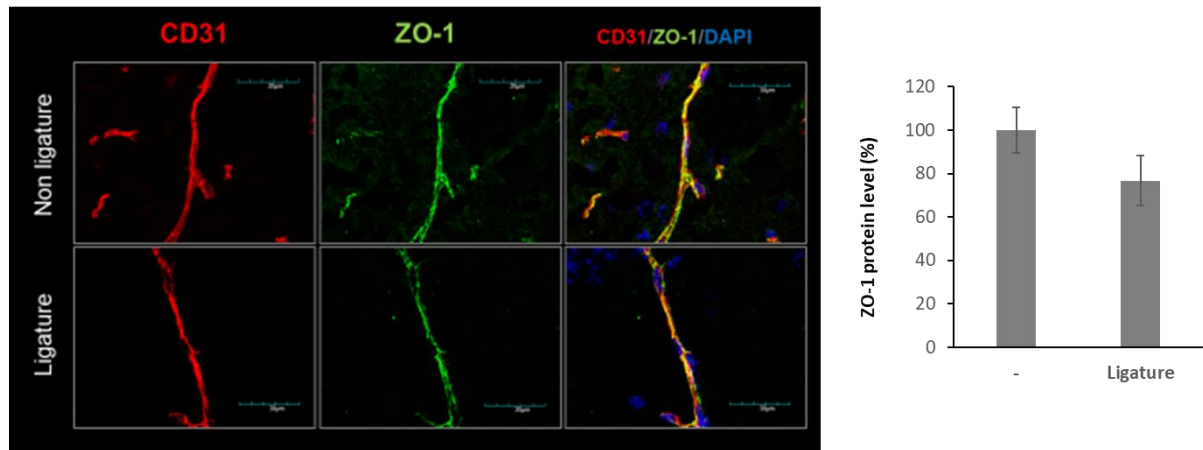

Supplemental figure 2.

The effect of ligature-induced PD in the levels of ZO1 on blood vessel in hippocampus. A. One week after ligation, hippocampus was collected. Representative image of ZO1 (green) was showed along the vessel labeled with endothelial marker (CD31). Blue showed nuclear. Bar=30  $\mu$ m. Bar graph showed the ratio area of ZO1 expression in the vessel. (mean  $\pm$  SE, n=10/group).

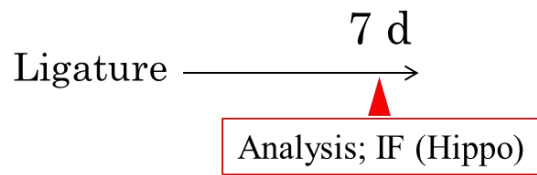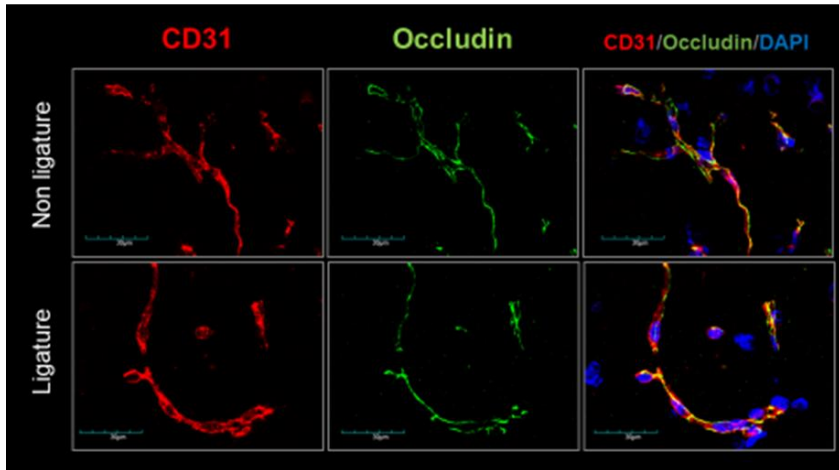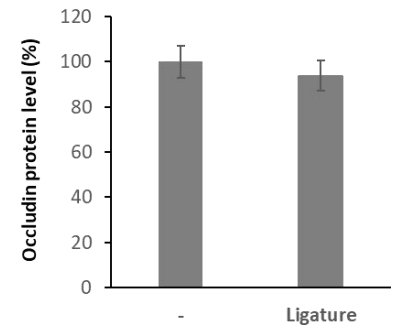

Supplemental figure.3

The effect of ligature-induced PD in the levels of Occludin on blood vessel in hippocampus. A. One week after ligation, hippocampus was collected. Representative image of Occludin (green) was showed along the vessel labeled with endothelial marker (CD31). Blue showed nuclear. Bar=30  $\mu$ m. Bar graph showed the ratio area of Occludin expression in the vessel. (mean  $\pm$  SE, n=10/group).
